# Supplementary material for: Synergistic interactions with PI3K inhibition that induce apoptosis
Source: eLife. 2017 May 31;6:e24523. doi: 10.7554/eLife.24523 (PMC5479695; doi:10.7554/eLife.24523)
Supplement: Supplementary file 1. — DOI: http://dx.doi.org/10.7554/eLife.24523.015 [file elife-24523-supp1.xlsx]

## Sheet: STARS
Gene Symbol	Minimum Change
PBX1	5.27e-06
EIF2B3	3.73e-05
TACC1	7.68e-05
PSMC3	0.000246269
EIF1AX	0.000367556
AP4B1	0.000404957
FPGT-TNNI3K	0.000491412
ZIC3	0.00058806
PSMG2	0.00058806
ZAK	0.000833401
ZG16B	0.000833401
C9orf85	0.000868969
ADORA3	0.000970299
PIM2	0.000970299
ZNF565	0.000970299
KIAA2026	0.000970299
KCNK15	0.000970299
PMPCB	0.000970299
TCIRG1	0.000970299
MED13L	0.000970299
ZFP1	0.000970299
PCDHGB3	0.000970299
SLITRK1	0.000970299
GNRH1	0.000970299
C6orf170	0.000970299
GIMAP6	0.000970299
CC2D1A	0.000970299
NFATC1	0.001176
PDGFRL	0.001176
RPAIN	0.001176
EHHADH	0.00131435
ZNF808	0.00144089
PYCRL	0.00184539
YBEY	0.00199708
HOOK3	0.00199708
LUZP2	0.00214219
SUGP1	0.00230496
DCAF4	0.00230496
WBSCR22	0.00230496
GALNT5	0.00230496
ZSCAN1	0.00230496
SLC43A1	0.00230496
SYNCRIP	0.00230496
PSMF1	0.00230496
ZNF224	0.00230496
CRYZL1	0.00230496
IFNA14	0.0024594

## Sheet: RIGER
Gene Symbol	p-value
EIF2B3	0.002696
TACC1	0.004662
PSMC3	0.006928
EIF1AX	0.008665
PSMG2	0.008879
C9orf85	0.008897
PYCRL	0.009702
PCDHGB3	0.009792
ZNF565	0.01056
IFNA14	0.01126
KIAA2026	0.0121
SLITRK1	0.01296
PIM2	0.01354
EHHADH	0.0137
ZIC3	0.01418
KCNK15	0.01451
TCIRG1	0.0146
PMPCB	0.01462
HOOK3	0.01473
CC2D1A	0.01513
MED13L	0.01524
RPL23A	0.01601
ADORA3	0.01629
C6orf170	0.01646
ZFP1	0.01651
GIMAP6	0.01704
GNRH1	0.01723
PDGFRL	0.01772
INO80	0.01822
ZFR	0.01842
LUZP2	0.01863
SLC43A1	0.01866
CNNM1	0.01899
CD1A	0.02028
SUGP1	0.02037
NAA25	0.02054
SRP54	0.02075
DCAF4	0.02086
RPAIN	0.02168
ZSCAN1	0.02189
NFATC1	0.02224
CRYZL1	0.0233
PSMF1	0.02335
RABEP2	0.02361
RBPJL	0.02402
UBASH3A	0.02477
