# Supplementary material for: Synergistic interactions with PI3K inhibition that induce apoptosis
Source: eLife. 2017 May 31;6:e24523. doi: 10.7554/eLife.24523 (PMC5479695; doi:10.7554/eLife.24523)
Supplement: Supplementary file 2. — DOI: http://dx.doi.org/10.7554/eLife.24523.016 [file elife-24523-supp2.xlsx]

## Sheet: Sheet1
symbol	cloneId	Sequence
EmptyT	TRCN0000208001	ACACTCGAGCACTTTTTGAAT
LUCIFERASE	TRCN0000072250	AGAATCGTCGTATGCAGTGAA
LUCIFERASE	TRCN0000072256	ACGCTGAGTACTTCGAAATGT
LUCIFERASE	TRCN0000072261	CACTCGGATATTTGATATGTG
RFP	TRCN0000072212	CCGTAATGCAGAAGAAGACCA
PIM2	TRCN0000001627	CCAGTCATTAAAGTCCAGTAT
PIM2	TRCN0000001628	GCCCAGGATCTCTTTGACTAT
PIM2	TRCN0000001629	GATGAACCCTACACTGACTTT
PIM2	TRCN0000001630	CCAGGATCTCTTTGACTATAT
PIM2	TRCN0000199081	CCCTACTCTGTTATCCCAAGT
PIM2	TRCN0000200008	CGACTCCAGGTGGCCATCAAA
PIM2	TRCN0000219888	CTGTGCCAAACTCATTGATTT
TACC1	TRCN0000157354	CCACGTCATGTGGTCAGAAAT
TACC1	TRCN0000157519	GCATCAGTAAGTCAGCAGGTT
TACC1	TRCN0000275855	CATCAGTAAGTCAGCAGGTTT
TACC1	TRCN0000285450	GAAGGCAAAGTCGCGTTTAAT
ZAK	TRCN0000003267	ACGAGAGATTAACCATTCCAA
ZAK	TRCN0000196862	GCCCATTAAGTATCAACAGAT
ZAK	TRCN0000196939	GCCTAGATTTGTGGTTCTTTC
ZFR	TRCN0000016964	CCCTGAGAAGTATGACATAAA
ZFR	TRCN0000016966	GCCAAGGTGCAACTCAGTATA
ZFR	TRCN0000329987	GCCTAGTATTCGAGCAAGAAA
ZFR	TRCN0000329989	TGTACAGTGTTAGGTATTATT
ZNF565	TRCN0000015923	CCTGGTATCAAACCTTACGAA
ZNF565	TRCN0000015924	CCAGTTTGAGAGACAAGTCAA
ZNF565	TRCN0000015925	CCCTGGATGATTGCAAATGAT
ZNF565	TRCN0000015926	CGTAGTTCACAACTTACCGAA
