# Supplementary material for: Synergistic interactions with PI3K inhibition that induce apoptosis
Source: eLife. 2017 May 31;6:e24523. doi: 10.7554/eLife.24523 (PMC5479695; doi:10.7554/eLife.24523)
Supplement: Supplementary file 3. — DOI: http://dx.doi.org/10.7554/eLife.24523.017 [file elife-24523-supp3.xlsx]

## Sheet: Glossary
Worksheet	Content
Structure	Structure and SMILES for 6 compounds
HTH-01-091 ICKP	Selectivity array results by ICKP
HTH-0-096 ICKP	Selectivity array results by ICKP
TL-01-124 ActivX	Selectivity array results by ActivX
HTH-01-091 IC50	Potency test
HTH-02-096 IC50	Potency test
ZAK inhibitors IC50	Potency test

## Sheet: Structure
Molecule Name	Structure	SMILES	Note
HTH-01-091		CN(C)C[C@H]1CC[C@@H](CC1)N1C(=O)NCC2=CN=C3C=CC(=CC3=C12)C1=CC(Cl)=C(O)C(Cl)=C1
HTH-02-096		CN(C)C[C@H]1CC[C@@H](CC1)N1C(=O)N(C)CC2=CN=C3C=CC(=NC3=C12)C1=CC(Cl)=C(O)C(Cl)=C1
HYJ-02-129-6		COC1=C2C=CNC2=NC=C1\C=C\C1=CC(=CC=C1C)C(=O)NC1=CC=CC(=C1)C(C)(C)C#N
HYJ-2-034-2		COC1=C2C=CNC2=NC=C1CCC1=CC(=CC=C1C)C(=O)NC1=CC=C(OC2CCN(C)CC2)C(=C1)C(F)(F)F
TL-1-124		CCN1CCN(CC2=CC=C(NC(=O)C3=CC=C(C)C(OC4=C5C=NNC5=NC=N4)=C3)C=C2C(F)(F)F)CC1
TL-2-082		CCN1CCN(CC2=CC=C(NC(=O)C3=CC=C(C)C(OC4=C5C=CNC5=NC=N4)=C3)C=C2)CC1	negative control of TL-1-124, no ZAK

## Sheet: HTH-01-091 ICKP
Molecule Name	Target Kinase	mean of percentage of Kinase activity (%)	S.d. of percentage of Kinase activity (%)	Compound Concentration (uM)
HTH-01-091	PIM1	1	0	1
HTH-01-091	PIM3	1	1	1
HTH-01-091	PIM2	2	0	1
HTH-01-091	RIPK2	3	1	1
HTH-01-091	DYRK3	5	1	1
HTH-01-091	SmMLCK	8	1	1
HTH-01-091	CLK2	11	0	1
HTH-01-091	MELK	13	0	1
HTH-01-091	HIPK2	13	6	1
HTH-01-091	DAPK1	15	1	1
HTH-01-091	GCK	16	1	1
HTH-01-091	DYRK2	18	1	1
HTH-01-091	TAO1	18	1	1
HTH-01-091	TAK1	22	0	1
HTH-01-091	CK2	23	4	1
HTH-01-091	DYRK1A	23	2	1
HTH-01-091	ERK8	24	4	1
HTH-01-091	HIPK1	24	3	1
HTH-01-091	HIPK3	25	4	1
HTH-01-091	STK33	26	1	1
HTH-01-091	MAP4K5	32	0	1
HTH-01-091	YES1	32	0	1
HTH-01-091	CHK2	34	0	1
HTH-01-091	AMPK (hum)	34	3	1
HTH-01-091	Aurora B	35	2	1
HTH-01-091	MLK1	35	0	1
HTH-01-091	Lck	35	5	1
HTH-01-091	PDGFRA	35	4	1
HTH-01-091	CK1Â¥Ã¤	36	5	1
HTH-01-091	MINK1	38	1	1
HTH-01-091	JAK2	39	2	1
HTH-01-091	VEG-FR	43	4	1
HTH-01-091	DDR2	44	2	1
HTH-01-091	MST2	45	0	1
HTH-01-091	BTK	45	5	1
HTH-01-091	RSK1	48	4	1
HTH-01-091	TTK	53	3	1
HTH-01-091	TrkA	53	8	1
HTH-01-091	MLK3	54	0	1
HTH-01-091	Src	54	2	1
HTH-01-091	MAP4K3	55	1	1
HTH-01-091	MKK1	62	5	1
HTH-01-091	RSK2	62	11	1
HTH-01-091	EPH-A4	63	3	1
HTH-01-091	MSK1	65	2	1
HTH-01-091	NUAK1	66	4	1
HTH-01-091	EPH-A2	66	8	1
HTH-01-091	CDK2-Cyclin A	67	16	1
HTH-01-091	TSSK1	68	6	1
HTH-01-091	ERK5	70	12	1
HTH-01-091	ABL	70	3	1
HTH-01-091	EPH-B2	70	2	1
HTH-01-091	PKCÂ¥Ã£	71	7	1
HTH-01-091	TIE2	71	3	1
HTH-01-091	SGK1	72	4	1
HTH-01-091	PAK5	73	5	1
HTH-01-091	PHK	74	4	1
HTH-01-091	MKK2	75	9	1
HTH-01-091	CSK	76	2	1
HTH-01-091	PRK2	77	0	1
HTH-01-091	PRAK	78	4	1
HTH-01-091	PKCa	79	17	1
HTH-01-091	PKD1	79	11	1
HTH-01-091	SIK2	79	2	1
HTH-01-091	PAK4	79	1	1
HTH-01-091	IRR	79	2	1
HTH-01-091	CK1Â¥Ã£2	80	12	1
HTH-01-091	S6K1	81	2	1
HTH-01-091	ROCK 2	82	5	1
HTH-01-091	FGF-R1	82	5	1
HTH-01-091	SIK3	83	4	1
HTH-01-091	p38a MAPK	84	2	1
HTH-01-091	HER4	84	9	1
HTH-01-091	p38b MAPK	85	9	1
HTH-01-091	BRSK1	85	9	1
HTH-01-091	EF2K	85	13	1
HTH-01-091	IRAK4	85	7	1
HTH-01-091	p38g MAPK	86	2	1
HTH-01-091	CHK1	86	8	1
HTH-01-091	GSK3b	86	4	1
HTH-01-091	TTBK2	86	3	1
HTH-01-091	IRAK1	86	6	1
HTH-01-091	PKBb	88	5	1
HTH-01-091	TBK1	88	17	1
HTH-01-091	PAK2	88	24	1
HTH-01-091	p38d MAPK	89	0	1
HTH-01-091	MAPKAP-K3	89	5	1
HTH-01-091	PAK6	89	4	1
HTH-01-091	ASK1	90	1	1
HTH-01-091	CAMKKb	91	54	1
HTH-01-091	CDK9-Cyclin T1	92	4	1
HTH-01-091	IKKe	92	5	1
HTH-01-091	IGF-1R	92	2	1
HTH-01-091	ERK2	93	7	1
HTH-01-091	CAMK1	93	5	1
HTH-01-091	MST3	93	1	1
HTH-01-091	OSR1	93	4	1
HTH-01-091	ULK1	93	1	1
HTH-01-091	PINK	93	2	1
HTH-01-091	MARK2	94	3	1
HTH-01-091	MARK3	94	2	1
HTH-01-091	SRPK1	94	13	1
HTH-01-091	PLK1	95	0	1
HTH-01-091	TLK1	95	6	1
HTH-01-091	MARK4	95	0	1
HTH-01-091	NEK6	95	8	1
HTH-01-091	TESK1	95	0	1
HTH-01-091	PKCz	96	9	1
HTH-01-091	MST4	96	3	1
HTH-01-091	BRK	96	4	1
HTH-01-091	JNK1	97	3	1
HTH-01-091	MARK1	97	1	1
HTH-01-091	MAPKAP-K2	98	10	1
HTH-01-091	Aurora A	98	7	1
HTH-01-091	ZAP70	98	15	1
HTH-01-091	MKK6	99	10	1
HTH-01-091	EPH-B3	99	23	1
HTH-01-091	JNK2	100	3	1
HTH-01-091	LKB1	100	11	1
HTH-01-091	NEK2a	100	7	1
HTH-01-091	IR	100	3	1
HTH-01-091	JNK3	101	1	1
HTH-01-091	PKBa	101	3	1
HTH-01-091	WNK1	101	4	1
HTH-01-091	PDK1	102	0	1
HTH-01-091	TGFBR1	102	10	1
HTH-01-091	MNK2	103	2	1
HTH-01-091	TTBK1	103	5	1
HTH-01-091	IKKb	104	13	1
HTH-01-091	EPH-B4	104	17	1
HTH-01-091	ULK2	105	15	1
HTH-01-091	MPSK1	107	11	1
HTH-01-091	MNK1	109	1	1
HTH-01-091	MEKK1	111	8	1
HTH-01-091	PKA	112	24	1
HTH-01-091	SYK	112	4	1
HTH-01-091	EIF2AK3	114	18	1
HTH-01-091	ERK1	119	17	1
HTH-01-091	EPH-B1	122	7	1
HTH-01-091	BRSK2	125	2	1

## Sheet: HTH-02-096 ICKP
Molecule Name	Target Kinase	mean of percentage of Kinase activity (%)	S.d. of percentage of Kinase activity (%)	Compound Concentration (uM)
HTH-02-096	PIM1	0	0	1
HTH-02-096	PIM2	0	0	1
HTH-02-096	DYRK1A	1	0	1
HTH-02-096	DYRK3	1	1	1
HTH-02-096	CLK2	1	0	1
HTH-02-096	DAPK1	2	1	1
HTH-02-096	PIM3	4	0	1
HTH-02-096	GCK	4	1	1
HTH-02-096	RIPK2	4	1	1
HTH-02-096	MLK3	5	2	1
HTH-02-096	TAK1	5	1	1
HTH-02-096	Lck	5	2	1
HTH-02-096	HIPK2	6	0	1
HTH-02-096	TAO1	6	3	1
HTH-02-096	AMPK (hum)	8	3	1
HTH-02-096	HIPK1	8	3	1
HTH-02-096	HIPK3	8	0	1
HTH-02-096	CHK2	10	4	1
HTH-02-096	CK2	10	4	1
HTH-02-096	DYRK2	10	2	1
HTH-02-096	MLK1	10	4	1
HTH-02-096	MELK	11	8	1
HTH-02-096	MAP4K3	11	6	1
HTH-02-096	STK33	12	2	1
HTH-02-096	GSK3b	12	4	1
HTH-02-096	PKC?	13	5	1
HTH-02-096	YES1	13	4	1
HTH-02-096	JAK2	14	1	1
HTH-02-096	RSK1	16	7	1
HTH-02-096	DDR2	17	7	1
HTH-02-096	PHK	18	7	1
HTH-02-096	Aurora B	18	7	1
HTH-02-096	Src	18	11	1
HTH-02-096	ERK8	19	1	1
HTH-02-096	EPH-B2	19	11	1
HTH-02-096	SmMLCK	21	5	1
HTH-02-096	CDK2-Cyclin A	22	4	1
HTH-02-096	VEG-FR	22	3	1
HTH-02-096	PKCa	23	5	1
HTH-02-096	EPH-A4	23	6	1
HTH-02-096	TrkA	23	9	1
HTH-02-096	TTK	24	6	1
HTH-02-096	BTK	25	8	1
HTH-02-096	CAMKKb	27	6	1
HTH-02-096	NUAK1	27	5	1
HTH-02-096	PDGFRA	27	10	1
HTH-02-096	ERK5	30	2	1
HTH-02-096	JNK3	30	5	1
HTH-02-096	RSK2	30	9	1
HTH-02-096	PRK2	32	7	1
HTH-02-096	ABL	35	9	1
HTH-02-096	MINK1	38	9	1
HTH-02-096	EPH-A2	38	12	1
HTH-02-096	MAP4K5	42	53	1
HTH-02-096	MST2	43	3	1
HTH-02-096	TSSK1	44	11	1
HTH-02-096	SGK1	45	3	1
HTH-02-096	CDK9-Cyclin T1	45	0	1
HTH-02-096	MSK1	46	6	1
HTH-02-096	CK1?	47	8	1
HTH-02-096	ZAP70	48	12	1
HTH-02-096	SIK2	49	1	1
HTH-02-096	SIK3	54	11	1
HTH-02-096	PAK4	54	0	1
HTH-02-096	CAMK1	55	16	1
HTH-02-096	EPH-B4	56	29	1
HTH-02-096	MKK2	57	3	1
HTH-02-096	S6K1	58	5	1
HTH-02-096	MKK1	59	2	1
HTH-02-096	SRPK1	60	1	1
HTH-02-096	ASK1	60	20	1
HTH-02-096	BRSK2	61	11	1
HTH-02-096	IRAK4	61	10	1
HTH-02-096	EPH-B1	62	9	1
HTH-02-096	PKD1	64	5	1
HTH-02-096	MNK2	64	9	1
HTH-02-096	MST3	65	11	1
HTH-02-096	IKKe	67	21	1
HTH-02-096	MST4	68	14	1
HTH-02-096	TIE2	68	10	1
HTH-02-096	FGF-R1	68	22	1
HTH-02-096	PAK5	69	0	1
HTH-02-096	IRR	73	13	1
HTH-02-096	JNK1	74	7	1
HTH-02-096	TBK1	74	3	1
HTH-02-096	TLK1	75	3	1
HTH-02-096	p38b MAPK	76	4	1
HTH-02-096	HER4	77	12	1
HTH-02-096	ULK2	78	8	1
HTH-02-096	JNK2	80	6	1
HTH-02-096	PRAK	80	4	1
HTH-02-096	CSK	80	4	1
HTH-02-096	NEK2a	81	11	1
HTH-02-096	p38g MAPK	82	5	1
HTH-02-096	PKBa	83	0	1
HTH-02-096	MKK6	84	4	1
HTH-02-096	p38d MAPK	84	11	1
HTH-02-096	PDK1	84	10	1
HTH-02-096	EIF2AK3	84	1	1
HTH-02-096	BRSK1	85	11	1
HTH-02-096	MARK2	86	11	1
HTH-02-096	MARK1	87	7	1
HTH-02-096	TESK1	87	10	1
HTH-02-096	TGFBR1	87	2	1
HTH-02-096	CK1?2	88	9	1
HTH-02-096	IRAK1	88	17	1
HTH-02-096	EPH-B3	88	18	1
HTH-02-096	IR	88	2	1
HTH-02-096	PKCz	89	7	1
HTH-02-096	TTBK1	89	2	1
HTH-02-096	OSR1	89	3	1
HTH-02-096	ERK1	90	5	1
HTH-02-096	PKA	90	9	1
HTH-02-096	Aurora A	90	11	1
HTH-02-096	SYK	90	10	1
HTH-02-096	MARK3	91	4	1
HTH-02-096	p38a MAPK	92	4	1
HTH-02-096	ULK1	92	0	1
HTH-02-096	PKBb	93	17	1
HTH-02-096	MAPKAP-K3	93	6	1
HTH-02-096	TTBK2	93	1	1
HTH-02-096	PLK1	94	5	1
HTH-02-096	MPSK1	94	6	1
HTH-02-096	MARK4	95	8	1
HTH-02-096	PAK6	95	1	1
HTH-02-096	MEKK1	95	9	1
HTH-02-096	ERK2	96	7	1
HTH-02-096	MNK1	96	9	1
HTH-02-096	EF2K	97	4	1
HTH-02-096	LKB1	98	12	1
HTH-02-096	CHK1	99	3	1
HTH-02-096	IGF-1R	99	2	1
HTH-02-096	MAPKAP-K2	100	16	1
HTH-02-096	IKKb	100	22	1
HTH-02-096	PAK2	101	9	1
HTH-02-096	PINK	101	2	1
HTH-02-096	BRK	106	5	1
HTH-02-096	NEK6	108	19	1
HTH-02-096	ROCK 2	109	13	1
HTH-02-096	WNK1	116	4	1

## Sheet: TL-01-124 ActivX
Molecule Name	Kinase	Reference	Description	Sequence	Labeling Site	% Inhibition (%)	drug concentration (uM)
TL-1-124	p38a	UniRef100_Q16539	Mitogen-activated protein kinase 14 n=3 Tax=Eutheria RepID=MK14_HUMAN	QELNkTIWEVPER	Other	98.6	1
TL-1-124	ZAK	UniRef100_Q9NYL2	Mitogen-activated protein kinase kinase kinase MLT [Homo sapiens (Human)]	WISQDkEVAVKK	Lys1	95.2	1
TL-1-124	ABL,ARG	UniRef100_P00519	Proto-oncogene tyrosine-protein kinase ABL1 [Homo sapiens (Human)]	LMTGDTYTAHAGAkFPIK	Activation Loop	93	1
TL-1-124	GCK	UniRef100_Q12851	Mitogen-activated protein kinase kinase kinase kinase 2 n=1 Tax=Homo sapiens RepID=M4K2_HUMAN	DTVTSELAAVkIVK	Lys1	89.9	1
TL-1-124	TAK1	UniRef100_O43318	Mitogen-activated protein kinase kinase kinase 7 [Homo sapiens (Human)]	DLkPPNLLLVAGGTVLK	Lys2	86.5	1
TL-1-124	p38a	UniRef100_Q16539	Mitogen-activated protein kinase 14 n=3 Tax=Eutheria RepID=MK14_HUMAN	DLkPSNLAVNEDCELK	Lys2	71	1
TL-1-124	FER	UniRef100_P16591	Proto-oncogene tyrosine-protein kinase FER n=2 Tax=Homo sapiens RepID=FER_HUMAN	TSVAVkTCKEDLPQELK	Lys1	63.6	1
TL-1-124	ZC1/HGK,ZC2/TNIK,ZC3/MINK	UniRef100_O95819	Mitogen-activated protein kinase kinase kinase kinase 4 [Homo sapiens (Human)]	DIkGQNVLLTENAEVK	Lys2	44.8	1
TL-1-124	CSK	UniRef100_P41240	Tyrosine-protein kinase CSK [Homo sapiens (Human)]	VSDFGLTkEASSTQDTGKLPVK	Activation Loop	41.4	1
TL-1-124	RAF1	UniRef100_P04049	RAF proto-oncogene serine/threonine-protein kinase [Homo sapiens (Human)]	DMkSNNIFLHEGLTVK	Lys2	34.6	1
TL-1-124	JAK1_domain2	UniRef100_P23458	Tyrosine-protein kinase JAK1 n=1 Tax=Homo sapiens RepID=JAK1_HUMAN	IGDFGLTkAIETDKEYYTVK	Activation Loop	13.5	1
TL-1-124	BRAF	UniRef100_P15056	B-Raf proto-oncogene serine/threonine-protein kinase [Homo sapiens (Human)]	DLkSNNIFLHEDLTVK	Lys2	7.8	1
TL-1-124	GCK	UniRef100_Q12851	Mitogen-activated protein kinase kinase kinase kinase 2 n=1 Tax=Homo sapiens RepID=M4K2_HUMAN	IHRDIkGANLLLTLQGDVK	Lys2		1
TL-1-124	ZC2/TNIK,ZC3/MINK	UniRef100_Q9UKE5	TRAF2 and NCK-interacting kinase [Homo sapiens (Human)]	VIHRDIkGQNVLLTENAEVK	Lys2		1
TL-1-124	CSK	UniRef100_P41240	Tyrosine-protein kinase CSK [Homo sapiens (Human)]	VSDFGLTkEASSTQDTGKLPVKWTAPEALR	Activation Loop		1

## Sheet: HTH-01-091 IC50
Molecule Name	Kinase Tested	[ATP] Tested (uM)	IC50 (nM)
HTH-01-091	AURKB (Aurora B)	Km app	534
HTH-01-091	CDK1/cyclin B	Km app	2240
HTH-01-091	CDK7/cyclin H/MNAT1	Km app	1230
HTH-01-091	FRAP1 (mTOR)	Km app	632
HTH-01-091	GSK3A (GSK3 alpha)	Km app	1740
HTH-01-091	MELK	Km app	10.5
HTH-01-091	PIK3CA/PIK3R1 (p110 alpha/p85 alpha)	Km app	962
HTH-01-091	PIM1	Km app	12.5
HTH-01-091	PIM2	Km app	7.03
HTH-01-091	TTK		429

## Sheet: HTH-02-096 IC50
Molecule Name	Invitrogen Technology: Kinase Tested	Invitrogen Technology: [ATP] Tested (uM)	Invitrogen Technology: IC50 (nM)
HTH-02-096	PIM1	Km app	1.68
HTH-02-096	PIM2	Km app	3.53

## Sheet: ZAK inhibitors IC50
Molecule Name	Kinase Tested	[ATP] Tested (uM)	IC50 (nM)
HYJ-02-129-6	ZAK	Km app	103
HYJ2-34-2	ZAK	Km app	98.2
TL-1-124	ZAK	Km app	127
